# Supplementary material for: Early identification of acute kidney injury in Russell’s viper (Daboia russelii) envenoming using renal biomarkers
Source: PubMed Central journal article supplement (PMC6625728; doi:10.1371/journal.pntd.0007486), 2019-07-01
Supplement: pntd.0007486.s001.pdf [file pntd.0007486.s001.pdf]

## S1 Table

| <b>Biomarker</b> | <b>No AKI (n=16)</b> | <b>AKIN1 (n=24)</b>  | <b>AKIN2 (n=13)</b>  | <b>AKIN3 (n=12)</b>  | <b>p value</b> | <b>Correlation coefficient</b> |
|------------------|----------------------|----------------------|----------------------|----------------------|----------------|--------------------------------|
| sCr (mg/dl)      | 0.89 (0.83-1.1)      | 1.2 (1.1-1.4)        | 1.4 (1.2-1.5)        | 2.4 (2-2.9)          | <0.001         | 0.593                          |
| sCysC (mg/l)     | 0.95 (0.80-0.98)     | 1.0 (0.89-1.3)       | 1.1 (0.97-1.9)       | 1.8 (1.2-2.5)        | <0.001         | 0.434                          |
| uKIM1 (ng/ml)    | 0.84 (0.61-1.7)      | 0.99 (0.47-1.5)      | 1.5 (1-4.2)          | 1.1 (0.64-1.7)       | 0.12           | 0.112                          |
| uClu (ng/ml)     | 347 (101-1103)       | 563 (218-1588)       | 1463 (517-2549)      | 1614 (633-2738)      | 0.0002         | 0.339                          |
| uAlb (ng/ml)     | 22629 (19845-109526) | 29279 (19785-112856) | 29279 (21578-368156) | 99539 (20024-146823) | 0.061          | 0.152                          |
| uβ2M (ng/ml)     | 983 (611-2050)       | 989 (611-2212)       | 1385 (611-74565)     | 3350 (1011-4478)     | 0.016          | 0.209                          |
| uCysC (ng/ml)    | 2024 (160-6328)      | 7594 (925-11678)     | 3667 (2301-55705)    | 7594 (1773-8182)     | 0.66           | 0.145                          |
| uNGAL(ng/ml)     | 558 (48-985)         | 2266 (162-4564)      | 4097 (1583-12694)    | 11229 (1048-12969)   | <0.001         | 0.418                          |
| uOPN (ng/ml)     | 4178 (2972-8427)     | 7113 (2115-17705)    | 12189 (5164-21691)   | 8379 (4319-21576)    | 0.028          | 0.181                          |
| uTFF3 (ng/ml)    | 4228 (3610-10427)    | 6198 (2779-11856)    | 7875 (4116-13382)    | 14837 (6269-25756)   | 0.006          | 0.238                          |
